# Supplementary material
Source: publisher figshare collection journal article supplement (https://tandf.figshare.com/articles/dataset/_/5100367)
Supplement: Supplementary file 1 [file 1]

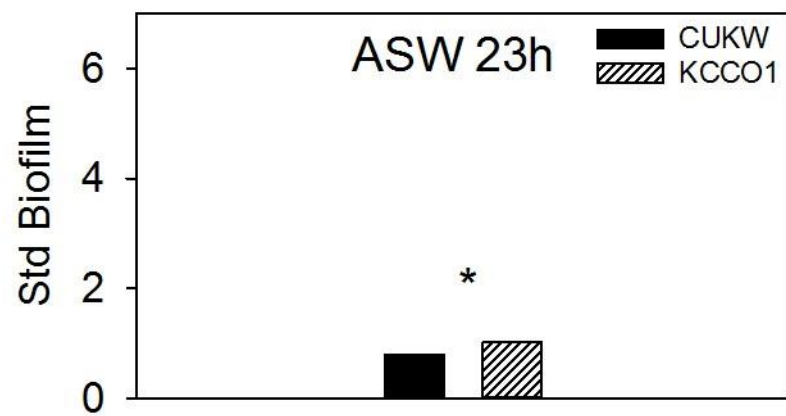

Figure S1. Standardized biofilm formation in ASW medium at 23 h in CUKW and KCCO1.

### CUKW dgc\_4914 (BFV93\_4914)

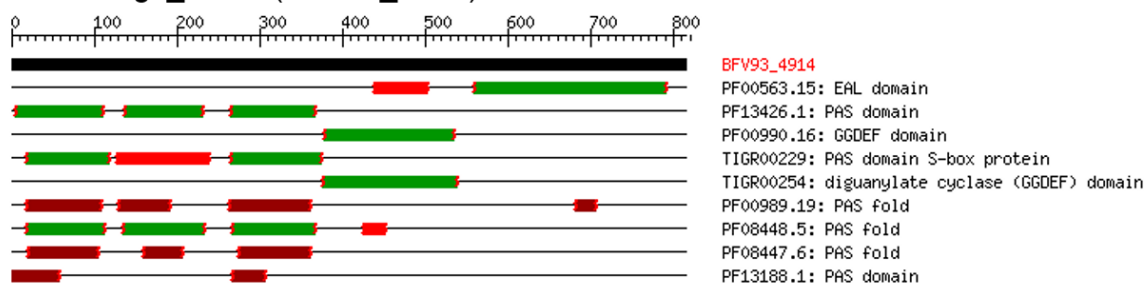

### KCC01 dgc\_4791 (BFV94\_4790)

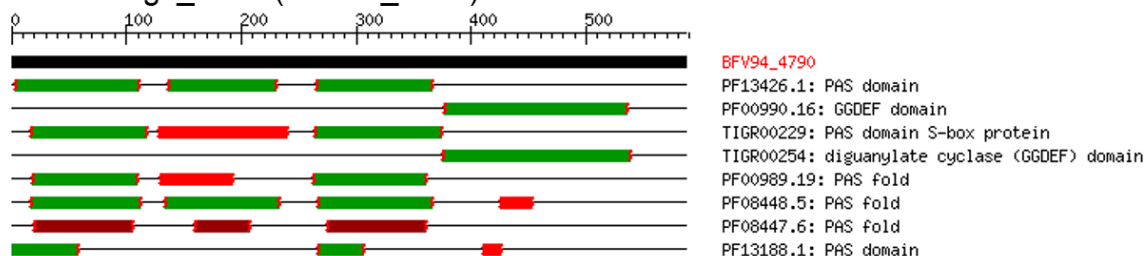

Figure S2. Comparative domain analysis of diguanylate cyclase gene (dgc\_4914) found to be lacking EAL domain in KCC01.

Table S1. BestKeeper analysis for +Cu (n=10).

| Target                                 | gyrB  | inf2  | pfk   | maf   |
|----------------------------------------|-------|-------|-------|-------|
| geo Mean [CT]                          | 23.26 | 20.92 | 26.97 | 23.97 |
| ar Mean [CT]                           | 23.28 | 20.93 | 26.98 | 23.98 |
| min [CT]                               | 22.18 | 19.92 | 26.44 | 23.22 |
| max [CT]                               | 24.97 | 22.30 | 28.08 | 25.44 |
| std dev [ $\pm$ CT]                    | 0.72  | 0.60  | 0.40  | 0.50  |
| CV [% CT]                              | 3.10  | 2.89  | 1.48  | 2.10  |
| min [x-fold]                           | -2.12 | -2.01 | -1.45 | -1.69 |
| max [x-fold]                           | 3.27  | 2.60  | 2.16  | 2.77  |
| std dev [ $\pm$ x-fold]                | 1.65  | 1.52  | 1.32  | 1.42  |
| Pearson coefficient of correlation [r] | 0.95  | 0.96  | 0.96  | 0.96  |
| p-value                                | 0.00  | 0.00  | 0.00  | 0.00  |

Table S2. BestKeeper analysis for low-nutrient (n=11).

| Target                                 | gyrB  | inf2  | pfk   | maf   |
|----------------------------------------|-------|-------|-------|-------|
| geo Mean [CT]                          | 18.67 | 16.57 | 21.35 | 20.20 |
| ar Mean [CT]                           | 18.70 | 16.61 | 21.38 | 20.20 |
| min [CT]                               | 17.14 | 15.19 | 19.55 | 19.63 |
| max [CT]                               | 20.56 | 18.35 | 22.87 | 20.92 |
| std dev [ $\pm$ CT]                    | 1.04  | 1.11  | 1.02  | 0.27  |
| CV [% CT]                              | 5.58  | 6.68  | 4.79  | 1.34  |
| min [x-fold]                           | -2.88 | -2.61 | -3.47 | -1.48 |
| max [x-fold]                           | 3.70  | 3.42  | 2.88  | 1.66  |
| std dev [ $\pm$ x-fold]                | 2.06  | 2.16  | 2.03  | 1.21  |
| Pearson coefficient of correlation [r] | 0.97  | 0.98  | 0.97  | 0.66  |
| p-value                                | 0.00  | 0.00  | 0.00  | 0.03  |

Table S3. Summary of domain comparisons and gene content among CUKW and KCC01 in putative diguanylate cyclase genes.

| CUKW GB<br>locus ID | GGDEF | EAL | Other domains                                                              | KCC01 GB<br>locus ID | GGDEF | EAL | Other domains                                                 |
|---------------------|-------|-----|----------------------------------------------------------------------------|----------------------|-------|-----|---------------------------------------------------------------|
| BFV93_0069          | Y     | Y   |                                                                            | BFV94_0069           | Y     | Y   |                                                               |
| BFV93_0081          | Y     | Y   | GAF                                                                        | BFV94_0081           | Y     | Y   | GAF                                                           |
| BFV93_0114          | Y     | N   |                                                                            | BFV94_0114           | Y     | N   |                                                               |
| BFV93_0133          | Y     | N   | 7 TM diverse intracellular signaling                                       | BFV94_0133           | Y     | N   | 7 TM diverse intracellular signaling                          |
| BFV93_0151          | Y     | Y   | PAS S-box protein, PAS fold, 7TM-DISM extracellular 2                      | BFV94_0152           | Y     | Y   | PAS S-box protein, PAS fold, 7TM-DISM extracellular 2         |
| BFV93_0158          | Y     | N   | response regulator receiver                                                | BFV94_0159           | Y     | N   | response regulator receiver                                   |
| BFV93_0161          | Y     | N   | MASE1                                                                      | BFV94_0162           | Y     | N   | MASE1                                                         |
| BFV93_0305          | Y     | N   |                                                                            | BFV94_0306           | Y     | N   |                                                               |
| BFV93_0379          | Y     | Y   | PAS S-box protein, PAS, PAS fold                                           | BFV94_0380           | Y     | Y   | PAS S-box protein, PAS, PAS fold                              |
| BFV93_0458          | Y     | N   | 7TM intracellular signaling, 7TMR-DISM extracellular 2                     | BFV94_0459           | Y     | N   | 7TM intracellular signaling, 7TMR-DISM extracellular 2        |
| BFV93_0583          | Y     | N   | PAS fold                                                                   | BFV94_0585           | y     | N   | PAS fold                                                      |
| BFV93_0640          | Y     | N   |                                                                            | BFV94_0642           | Y     | N   |                                                               |
| BFV93_0952          | Y     | N   |                                                                            | BFV94_0952           | Y     | N   |                                                               |
| BFV93_0985          | Y     | N   |                                                                            | BFV94_0985           | Y     | N   |                                                               |
| BFV93_1181          | Y     | N   | Two-component regulator propeller, Y_Y_Y                                   | BFV94_1181           | Y     | N   | Two-component regulator propeller, Y_Y_Y                      |
| BFV93_1256          | Y     | N   |                                                                            | BFV94_1257           | Y     | N   |                                                               |
| BFV93_1270          | Y     | Y   | PAS S-box protein, PAS, PAS fold, Two-component regulator propeller, Y_Y_Y | BFV94_1271           | Y     | Y   | PAS S-box protein, PAS, PAS fold                              |
| BFV93_1299          | Y     | N   |                                                                            | BFV94_1301           | Y     | N   |                                                               |
| BFV93_1306          | Y     | Y   | HAMP                                                                       | BFV94_1308           | Y     | Y   | HAMP                                                          |
| BFV93_1340          | Y     | N   | PAS S-box protein                                                          | BFV94_1342           | Y     | N   | PAS S-box protein                                             |
| BFV93_1352          | Y     | N   |                                                                            | BFV94_1354           | Y     | N   |                                                               |
| BFV93_1526          | Y     | Y   |                                                                            | BFV94_1531           | Y     | Y   |                                                               |
| BFV93_1544          | Y     | Y   | PAS S-box protein                                                          | BFV94_1548           | Y     | Y   | PAS S-box protein                                             |
| BFV93_1545          | Y     | Y   |                                                                            | BFV94_1549           | Y     | Y   |                                                               |
| BFV93_1557          | Y     | N   | PAS S-box protein, PAS fold, PAS                                           | BFV94_1561           | Y     | N   | PAS S-box protein, PAS fold, PAS                              |
| BFV93_1571          | Y     | Y   | Response regulator receiver, PAS S-box protein, PAS fold, PAS              | BFV94_1575           | Y     | Y   | Response regulator receiver, PAS S-box protein, PAS fold, PAS |
| BFV93_1572          | Y     | N   | Response regulator receiver                                                | BFV94_1576           | Y     | N   | Response regulator receiver                                   |
| BFV93_1606          | Y     | Y   |                                                                            | BFV94_1610           | Y     | Y   |                                                               |
| BFV93_1663          | Y     | N   | extracellular solute-binding family 3 protein                              | BFV94_1667           | Y     | N   | extracellular solute-binding family 3 protein                 |
| BFV93_1672          | Y     | N   |                                                                            | BFV94_1676           | Y     | N   |                                                               |
| BFV93_1731          | Y     | N   | Two-component regulator propeller, Y_Y_Y                                   | BFV94_1734           | Y     | N   | Two-component regulator propeller, Y_Y_Y                      |
| BFV93_1770          | Y     | N   | PAS S-box protein, PAS domain, PAS fold                                    | BFV94_1775           | Y     | N   | PAS S-box protein, PAS, PAS fold                              |
| BFV93_1889          | Y     | Y   | HAMP                                                                       | BFV94_1897           | Y     | Y   | HAMP                                                          |

|            |   |   |                                                                     |            |   |   |                                                        |
|------------|---|---|---------------------------------------------------------------------|------------|---|---|--------------------------------------------------------|
| BFV93_2053 | Y | N |                                                                     | BFV94_2061 | Y | N |                                                        |
| BFV93_2221 | Y | Y | GAF                                                                 | BFV94_2226 | Y | Y | GAF                                                    |
| BFV93_2222 | Y | N |                                                                     | BFV94_2227 | Y | N |                                                        |
| BFV93_2401 | Y | Y | Two-component regulator propeller, PAS S-box protein, PAS, PAS fold | BFV94_2406 | Y | Y |                                                        |
| BFV93_2492 | Y | Y |                                                                     | BFV94_2499 | Y | Y |                                                        |
| BFV93_2889 | Y | Y |                                                                     | BFV94_2901 | Y | Y |                                                        |
| BFV93_2981 | Y | N |                                                                     | BFV94_2993 | Y | N |                                                        |
| BFV93_3092 | Y | N |                                                                     | BFV94_3103 | Y | N |                                                        |
| BFV93_3197 | Y | N | response regulator receiver                                         | BFV94_3207 | Y | N | response regulator receiver                            |
| BFV93_3261 | Y | N | PAS S-box protein, PAS, PAS fold                                    | BFV94_3271 | Y | N | PAS S-box protein, PAS, PAS fold                       |
| BFV93_3389 | Y | N | 7TM intracellular signaling, 7TMR-DISM extracellular 2              | BFV94_3398 | Y | N | 7TM intracellular signaling, 7TMR-DISM extracellular 2 |
| BFV93_3474 | Y | Y | response regulator receiver                                         | BFV94_3483 | Y | Y | response regulator receiver                            |
| BFV93_3490 | Y | Y |                                                                     | BFV94_3499 | Y | Y |                                                        |
| BFV93_3520 | Y | Y | PAS domain S-box protein, PAS                                       | BFV94_3529 | Y | Y | PAS S-box protein, PAS                                 |
| BFV93_3580 | Y | N | response regulator receiver                                         | BFV94_3589 | Y | N | response regulator receiver                            |
| BFV93_3921 | Y | N |                                                                     | BFV94_3923 | Y | N |                                                        |
| BFV93_3984 | Y | N |                                                                     | BFV94_3987 | Y | N |                                                        |
| BFV93_3992 | Y | N |                                                                     | BFV94_3995 | Y | N |                                                        |
| BFV93_4148 | Y | N | PAS S-box protein, PAS, PAS fold, GAF                               | BFV94_4150 | Y | N | PAS S-box protein, PAS, PAS fold, GAF                  |
| BFV93_4905 | Y | N |                                                                     | BFV94_4642 | Y | N |                                                        |
| BFV93_4914 | Y | Y | PAS S-box protein, PAS, PAS fold                                    | BFV94_4790 | Y | Y | PAS S-box protein, PAS, PAS fold                       |
| BFV93_4965 | Y | N |                                                                     | BFV94_4937 | Y | N |                                                        |
| BFV93_1545 | Y | Y |                                                                     | BFV94_1549 | Y | Y |                                                        |
| BFV93_0411 | Y | Y |                                                                     | BFV94_0412 | Y | Y |                                                        |
| BFV93_3262 | Y | N |                                                                     | BFV94_3272 | Y | N |                                                        |
| BFV93_1451 | Y | Y | PAS S-box protein, PAS, PAS fold                                    | BFV94_1455 | Y | Y | PAS S-box protein, PAS, PAS fold                       |
